# Supplementary material for: Roles of miR-4442 in Colorectal Cancer: Predicting Early Recurrence and Regulating Epithelial-Mesenchymal Transition
Source: MDPI journal article supplement (doi:10.3390/genes14071414), 2023-07-08
Supplement: s1 [file s1]

**Table S3. Comparison of clinicopathological characteristics of colorectal cancer patients with early and late recurrence**

| Variable                                   | Early recurrence (n = 30) | Late recurrence (n = 26) | <i>p</i> value |
|--------------------------------------------|---------------------------|--------------------------|----------------|
| Age (year), median (IQR)                   | 71 (61–79)                | 64 (60–70)               | 0.059          |
| Sex                                        |                           |                          |                |
| Male                                       | 13                        | 14                       | 0.432          |
| Female                                     | 17                        | 12                       |                |
| Neoadjuvant chemotherapy                   |                           |                          |                |
| Present                                    | 3                         | 4                        | 0.543          |
| Absent                                     | 27                        | 22                       |                |
| Adjuvant chemotherapy                      |                           |                          |                |
| Present                                    | 13                        | 14                       | 0.432          |
| Absent                                     | 17                        | 12                       |                |
| Tumor location                             |                           |                          |                |
| Colon                                      | 14                        | 12                       | 0.969          |
| Rectum                                     | 16                        | 14                       |                |
| Tumor type <sup>†</sup>                    |                           |                          |                |
| Differentiated type                        | 26                        | 23                       | 0.840          |
| Undifferentiated type                      | 4                         | 3                        |                |
| Tumor size <sup>†</sup> (mm), median (IQR) | 40 (26–59)                | 51 (39–62)               | 0.130          |

|                                     |                 |                 |       |
|-------------------------------------|-----------------|-----------------|-------|
| Lymphatic invasion <sup>†‡</sup>    |                 |                 |       |
| Present                             | 22              | 14              | 0.129 |
| Absent                              | 8               | 12              |       |
| Venous invasion <sup>†‡</sup>       |                 |                 |       |
| Present                             | 24              | 16              | 0.127 |
| Absent                              | 6               | 10              |       |
| Tumor depth <sup>†§</sup>           |                 |                 |       |
| T3/4                                | 26              | 23              | 0.840 |
| T1/2                                | 4               | 3               |       |
| Lymph node metastasis <sup>†§</sup> |                 |                 |       |
| Positive                            | 22              | 17              | 0.519 |
| Negative                            | 8               | 9               |       |
| Stage <sup>†§</sup>                 |                 |                 |       |
| I                                   | 1               | 2               | 0.708 |
| II                                  | 7               | 7               |       |
| III                                 | 22              | 17              |       |
| CEA (ng/mL)                         | 6.5 (3.2–14.7)  | 6.4 (3.1–12.0)  | 0.407 |
| CA19-9 (U/mL)                       | 10.5 (4.1–41.1) | 10.3 (3.3–26.2) | 0.748 |
| Recurrence pattern                  |                 |                 |       |

|                                                     |                  |                  |         |
|-----------------------------------------------------|------------------|------------------|---------|
| Hematogenous                                        | 26               | 17               | 0.060   |
| Other than hematogeneous                            | 4                | 9                |         |
| Preoperative plasma level of miR-4442, median (IQR) | 1.74 (1.29–2.50) | 0.61 (0.44–0.93) | < 0.001 |

---

*IQR* interquartile range, *CEA* carcinoembryonic antigen, *CA19-9* carbohydrate antigen 19-9

† Pathological diagnosis

‡ According to the 9th edition of the Japanese Classification of Colorectal, Appendiceal, and Anal Carcinoma

§ According to the 8th edition of the International Union Against Cancer tumor, node, metastasis classification system
