# Supplementary material for: Roles of miR-4442 in Colorectal Cancer: Predicting Early Recurrence and Regulating Epithelial-Mesenchymal Transition
Source: MDPI journal article supplement (doi:10.3390/genes14071414), 2023-07-08
Supplement: s1 [file s1]

**Table S4. Characteristics of patients with metastatic liver cancer from colorectal cancer**

| Variable                                      | Total (n = 20) |
|-----------------------------------------------|----------------|
| Age (year), median (IQR)                      | 69 (49–76)     |
| Sex                                           |                |
| Male                                          | 10             |
| Female                                        | 10             |
| Neoadjuvant chemotherapy                      |                |
| Present                                       | 13             |
| Absent                                        | 7              |
| Adjuvant chemotherapy                         |                |
| Present                                       | 7              |
| Absent                                        | 13             |
| Tumor location                                |                |
| Colon                                         | 14             |
| Rectum                                        | 6              |
| Tumor type of primary colorectal <sup>†</sup> |                |
| Differentiated type                           | 20             |
| Undifferentiated type                         | 0              |
| Metastasis                                    |                |
| Synchronous                                   | 5              |
| Metachronous                                  | 15             |

*IQR* interquartile range

<sup>†</sup> Pathological diagnosis
