# Supplementary material for: Roles of miR-4442 in Colorectal Cancer: Predicting Early Recurrence and Regulating Epithelial-Mesenchymal Transition
Source: MDPI journal article supplement (doi:10.3390/genes14071414), 2023-07-08
Supplement: s1 [file s1]

**Table S1. Comparison of pre- and postoperative plasma microRNA levels in colorectal cancer patients with or without recurrence**

| Name             | Global normalization |          |          |           | Ratio            |                    |
|------------------|----------------------|----------|----------|-----------|------------------|--------------------|
|                  | R preop              | R postop | NR preop | NR postop | R preop/R postop | NR preop/NR postop |
| hsa-miR-4442     | 921                  | 782      | 710      | 557       | 1.18             | 1.27               |
| hsa-miR-4270     | 307                  | 311      | 286      | 209       | 0.99             | 1.37               |
| hsa-miR-711      | 255                  | 249      | 213      | 179       | 1.02             | 1.19               |
| hsa-miR-4675     | 290                  | 242      | 251      | 159       | 1.2              | 1.58               |
| hsa-miR-6802-5p  | 476                  | 399      | 409      | 315       | 1.19             | 1.3                |
| hsa-miR-6858-5p  | 445                  | 426      | 401      | 328       | 1.04             | 1.22               |
| hsa-miR-4689     | 988                  | 827      | 705      | 577       | 1.19             | 1.22               |
| hsa-miR-6771-5p  | 706                  | 715      | 696      | 591       | 0.99             | 1.18               |
| hsa-miR-6721-5p  | 315                  | 263      | 213      | 182       | 1.2              | 1.17               |
| hsa-miR-6756-5p  | 545                  | 522      | 492      | 423       | 1.05             | 1.17               |
| hsa-miR-10400-5p | 34746                | 30582    | 24138    | 20788     | 1.14             | 1.16               |
| hsa-miR-6738-5p  | 312                  | 320      | 282      | 246       | 0.98             | 1.15               |
| hsa-miR-3141     | 317                  | 274      | 246      | 217       | 1.16             | 1.13               |

R preop: preoperative plasma of colorectal patients with recurrence

R postop: postoperative plasma of colorectal patients with recurrence

NR preop: preoperative plasma of colorectal patients without recurrence

NR postop: postoperative plasma of colorectal patients without recurrence
