# Supplementary material for: Roles of miR-4442 in Colorectal Cancer: Predicting Early Recurrence and Regulating Epithelial-Mesenchymal Transition
Source: MDPI journal article supplement (doi:10.3390/genes14071414), 2023-07-08
Supplement: s1 [file s1]

**Table S2. Comparison of characteristics and tumor factors of colorectal cancer patients with high and low preoperative plasma levels of miR-4442**

| Variable                                   | Preoperative plasma level of miR-4442 |                 | <i>p</i> value |
|--------------------------------------------|---------------------------------------|-----------------|----------------|
|                                            | ≥ 0.79 (n = 54)                       | < 0.79 (n = 54) |                |
| Age (year), median (IQR)                   | 69 (62–77)                            | 68 (61–71)      | 0.243          |
| Sex                                        |                                       |                 |                |
| Male                                       | 23                                    | 28              | 0.335          |
| Female                                     | 31                                    | 26              |                |
| Neoadjuvant chemotherapy                   |                                       |                 |                |
| Present                                    | 5                                     | 7               | 0.540          |
| Absent                                     | 49                                    | 47              |                |
| Adjuvant chemotherapy                      |                                       |                 |                |
| Present                                    | 26                                    | 19              | 0.172          |
| Absent                                     | 28                                    | 35              |                |
| Tumor location                             |                                       |                 |                |
| Colon                                      | 26                                    | 29              | 0.564          |
| Rectum                                     | 28                                    | 25              |                |
| Tumor type <sup>†</sup>                    |                                       |                 |                |
| Differentiated type                        | 48                                    | 51              | 0.296          |
| Undifferentiated type                      | 6                                     | 3               |                |
| Tumor size <sup>†</sup> (mm), median (IQR) | 39 (23–55)                            | 39 (22–57)      | 0.953          |
| Lymphatic invasion <sup>†‡</sup>           |                                       |                 |                |
| Present                                    | 38                                    | 23              | 0.004          |
| Absent                                     | 16                                    | 31              |                |

|                                     |                |                |         |
|-------------------------------------|----------------|----------------|---------|
| Venous invasion <sup>†‡</sup>       |                |                |         |
| Present                             | 36             | 18             | < 0.001 |
| Absent                              | 18             | 36             |         |
| Tumor depth <sup>†§</sup>           |                |                |         |
| T3/4                                | 44             | 34             | 0.032   |
| T1/2                                | 10             | 20             |         |
| Lymph node metastasis <sup>†§</sup> |                |                |         |
| Positive                            | 36             | 20             | 0.002   |
| Negative                            | 18             | 34             |         |
| Stage <sup>†§</sup>                 |                |                |         |
| I                                   | 5              | 15             | 0.005   |
| II                                  | 13             | 19             |         |
| III                                 | 36             | 20             |         |
| CEA (ng/mL)                         | 6.2 (2.7–11.4) | 4.5 (2.3–8.1)  | 0.238   |
| CA19-9 (U/mL)                       | 9.0 (3.3–25.4) | 6.4 (3.4–15.1) | 0.349   |

---

*IQR* interquartile range, *CEA* carcinoembryonic antigen, *CA19-9* carbohydrate antigen 19-9

<sup>†</sup> Pathological diagnosis

<sup>‡</sup> According to the 9th edition of the Japanese Classification of Colorectal, Appendiceal, and Anal Carcinoma

<sup>§</sup> According to the 8th edition of the International Union Against Cancer tumor, node, metastasis classification system
